# Supplementary material for: Alcohol Use During Pregnancy is Associated with Specific Alterations in MicroRNA Levels in Maternal Serum
Source: PubMed Central journal article supplement — Alcohol Clin Exp Res. 2016 Apr 3;40(4):826–37. doi: 10.1111/acer.13026 (PMC4825401; doi:10.1111/acer.13026), 2016-04-03
Supplement: ACER-40-826-s003.pdf [file ACER-40-826-s003.pdf]

# Figure S3

## miR-4704-3p

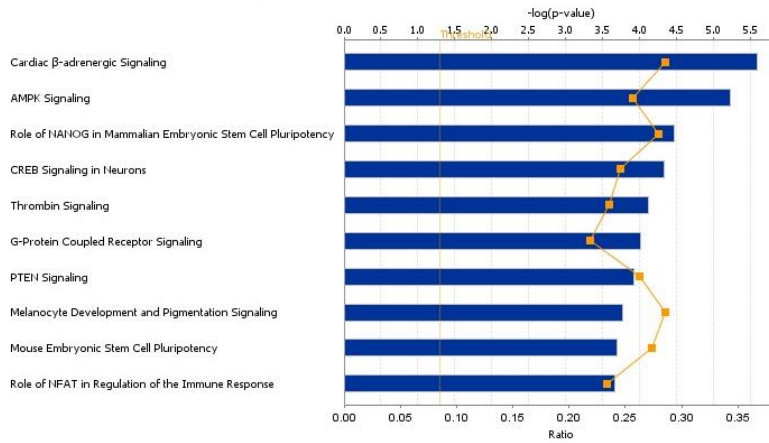

## miR-4743

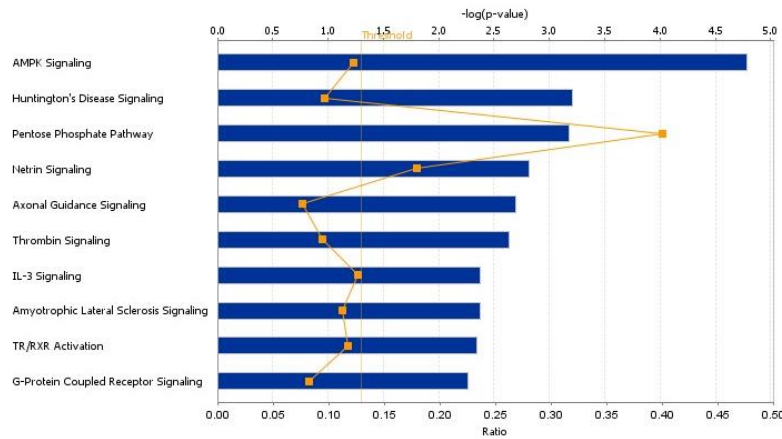

## miR-4657

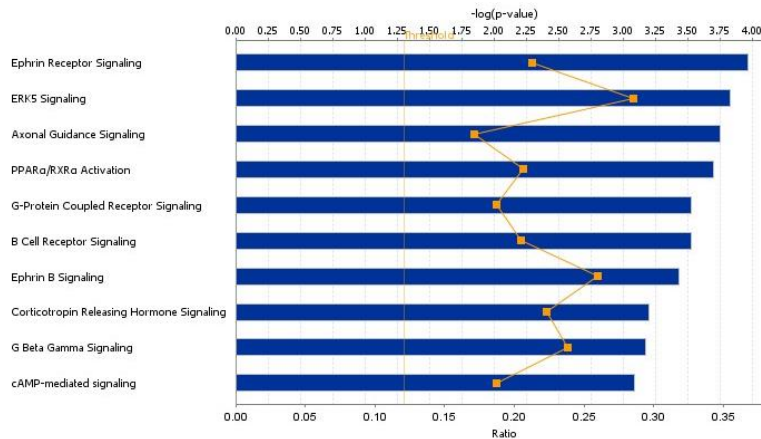

Figure S3. Top ten IPA canonical pathways for putative targets of miRs -4704-3p, -4743, and -4657. Threshold was set at  $p < 0.05$ .
