# Supplementary material for: Alcohol Use During Pregnancy is Associated with Specific Alterations in MicroRNA Levels in Maternal Serum
Source: PubMed Central journal article supplement — Alcohol Clin Exp Res. 2016 Apr 3;40(4):826–37. doi: 10.1111/acer.13026 (PMC4825401; doi:10.1111/acer.13026), 2016-04-03
Supplement: ACER-40-826-s005.pdf [file ACER-40-826-s005.pdf]

Figure S5

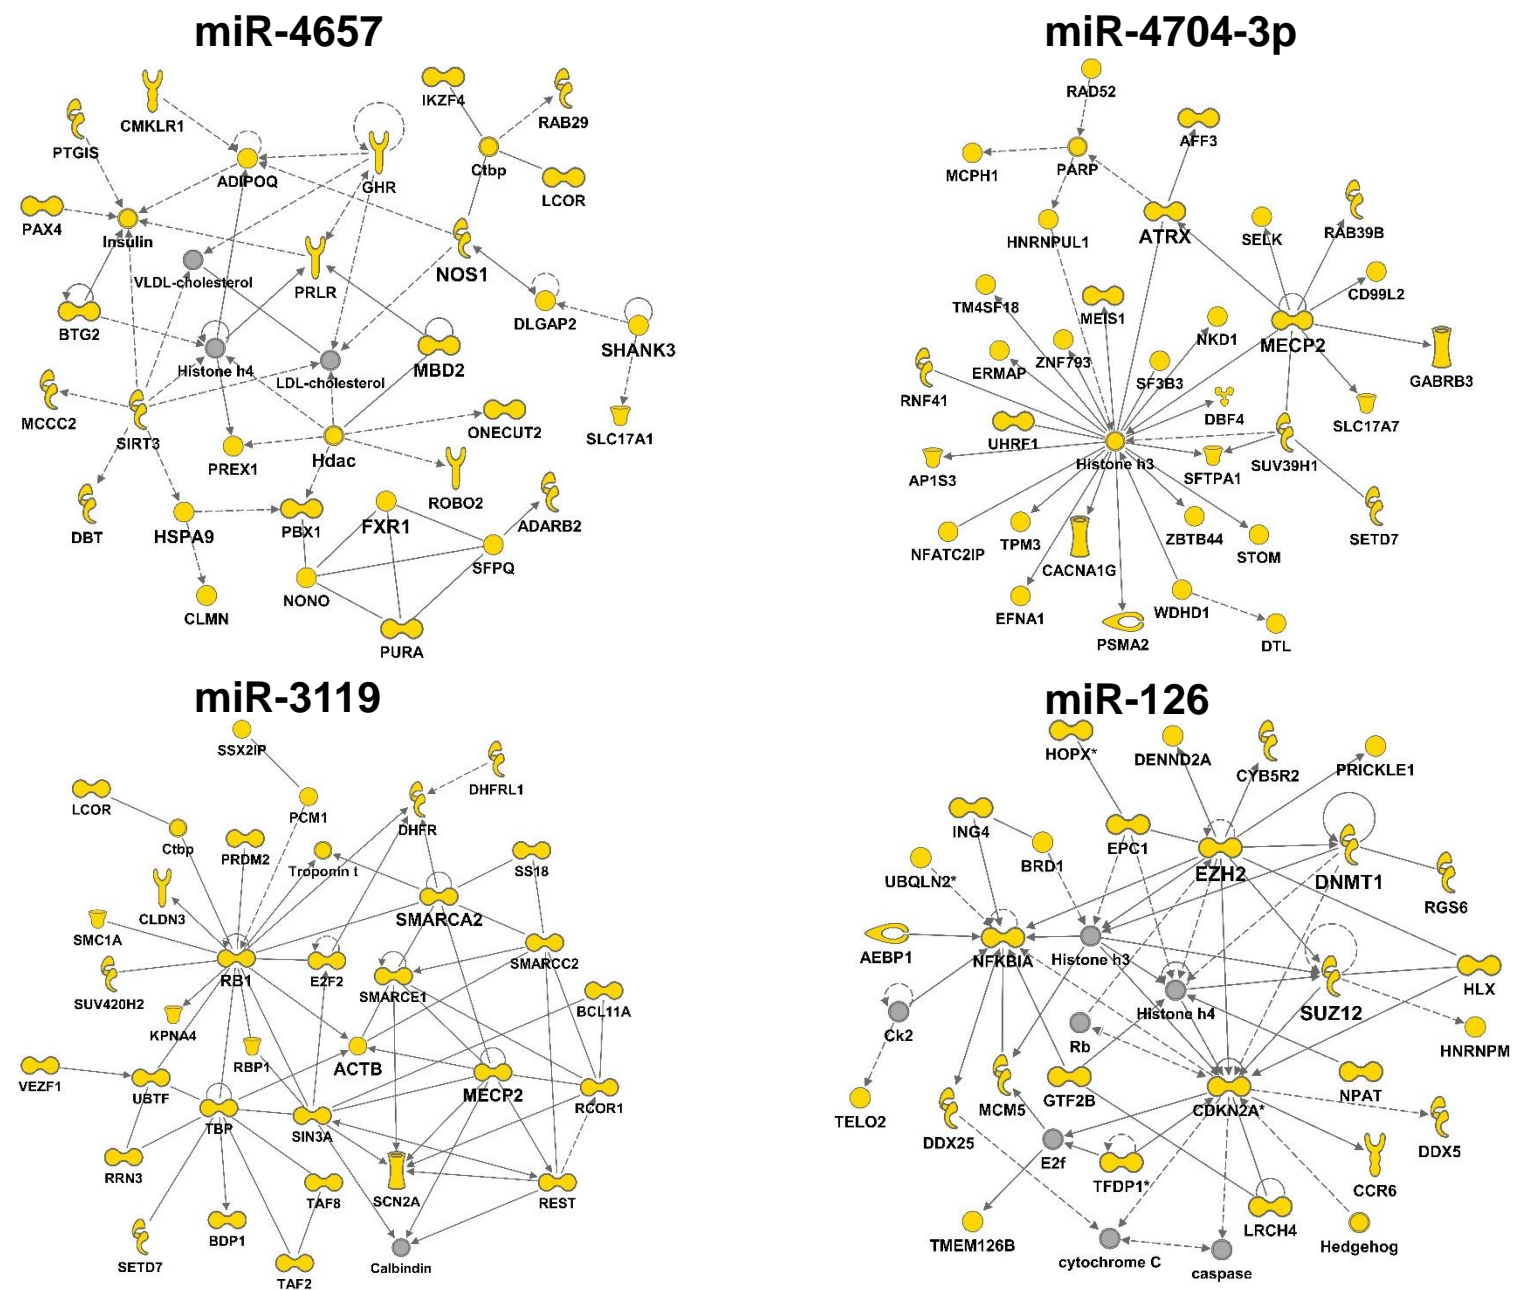

Fig. S5. IPA networks for putative targets of miRs -4657, 4704-3p, 3119, and 126. Molecules in yellow are predicted targets. Solid and dashed lines denote direct and indirect interactions, respectively.
